# Supplementary material for: Overexpression of the Capebp2 Gene Encoding the PEBP-like Protein Promotes the Cap Redifferentiation in Cyclocybe aegerita
Source: MDPI journal article supplement (doi:10.3390/jof9060657), 2023-06-12
Supplement: s1 [file s1]

DNA and protein sequence of *Acpebp2* (the introns were marked as gray)

>*C. aegerita*

ATGCGTTCTCTCATCCTCTTCATCGCTACCCTGGTGTGAGCCTTCACCAGCGTTGCGTT  
TGCGCAATGGCAAGACACGAACCTCACGGCAGTCAAACCTGGCCTTTGAAGAGGCCCA  
CGTGCGTTCCCCGTTCCGTCCAGAGTGCATGTCAACCCGCTAAATTATGTGAAATACT  
CCAGATAACTCGAGATGTTGGCCTCCCATTTCAACCCCTTGTATCCTCGGCGTGACC  
TACTTCTCCTCCAAAACAGGGGCTCATTCCCGTCAAAGCTGGCGCTGAACTCTCCATGA  
ACGGTGTGTACAACCTTCCTTCCCTTCCCCTCTCCTCTTTCTAAAATTTAATTTACAGACA  
CCTACTCTGCCCCACCTTCAACATCGTCGGCAACCCGGGCGTCGGCCCGCTCGTCAT  
CTTCTTGATCGACCCGGATGCACCATGGCCGCAAGATCCCTCTCTTGCCCAAGCCCGT  
CACTTCATGGGTGGCTCGTACTACTGGGACCCCGAGTCGGGCGTCCTGACAGAAATCT  
TCCTGCCTCTCAACCCGTATGATCACCCGCGGCCGTCGAAGGGGTCCGCTCGTCATCG  
GTGAGTGCTTCGTTTCAGAGCAGAGGATGGTGAAATCCTTGTTGCGTTGCTAACAGATG  
TCCATGTTGATAGGTACATCTTCTATGTATTCAAACAATCGGTTCGAGCTAGGTCTTCA  
AAAGACCATCACCGCGACAAGCTCTCGCCTCAACTTCAACCTGAGCGACTTTGCACG  
CGAGACCAACCTCGGAGACCCGATCGGGGGGACCTTCATGTGGATTAGCCCCGACCC  
GTAGGACGGACGAGCGGGATGTTAGCTTTTTTCGCCTTACTCACAGGTGGTCTCCGAGT  
CTTGACAAGCGAAGAAGGCACTGTACGTTTACTTTGGTGTATGTGCGGCTACTAGAC  
TCAGAGTACAGCGCCACAGAATCCATTATTCCTCTAGTGGCTGATAAGGCACCCATG  
AACGAATTTGTCCGCGGAATTGCTGCGTACTGGGACCTCTGGAGCTCACGACGCGCC  
ACCTGCCCACCATCGCCCCGGGGGCGCCACTTCCTCATGGGCAGGCATTACTTTGACTA  
CGTTTGGTCCTGTTTCTGGGGTCAGATAACCCATCGGCGAGTCTCCGCCTGAGTCCTTC  
GTTTAAGTTCAGGTATGGGGACTAA

Protein sequence

>*C. aegerita*

MATDIDAAHVAQLSDSLQRLQVQQDQAITAGQDGEENPGHSSRSPSPKSPISRDGYGFR  
KSGVSTPLMSGQIADGHPHSQLSHELVPDPNGLGWPAKSTISRLNATPEEKAAREKKMATA  
VRTILECIGEDPDREGLQRTPERYAQAIMWMTRGYEERLADVINDAIFAEDHDEMIVVRDI  
DISSLCEHHLVPFTGKIAIAYIPNQLVLGISKLARIAETFSRRLQVQERLTQKQIAIAVQEAIKP  
RGVAVVMEATHLCMTMRGVQKPGAITVTSCMLGCFRTQQKTREEFLTIIKH
