# Supplementary material for: Overexpression of the Capebp2 Gene Encoding the PEBP-like Protein Promotes the Cap Redifferentiation in Cyclocybe aegerita
Source: MDPI journal article supplement (doi:10.3390/jof9060657), 2023-06-12
Supplement: s1 [file s1]

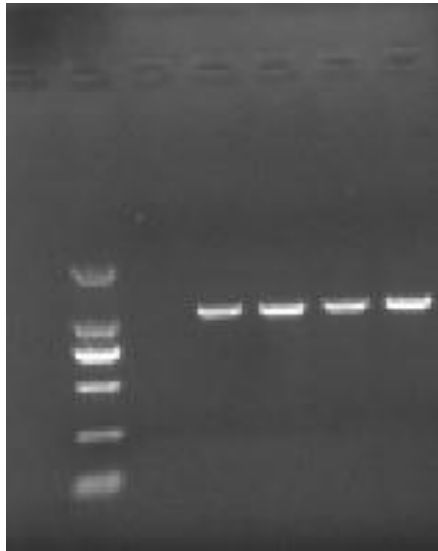

Lane1 2 3 4 5 6

Gel image: plasmid detection in fruiting bodies of four transformants. Lane 1-6: DL2000 marker; wild strain AC0007; T2-1, T2-7, T2-10 and T2-11.
